# Supplementary material for: Characteristics of Esketamine Prescribers Among Medicare Beneficiaries in the United States, 2019-2020
Source: PubMed Central journal article supplement (PMC10140803; doi:10.1001/jamanetworkopen.2023.11250), 2023-04-27
Supplement: jamanetwopen-e2311250-s001.pdf [file jamanetwopen-e2311250-s001.pdf]

## Data Sharing Statement

Havlik. Characteristics of Esketamine Prescribers Among Medicare Beneficiaries in the United States, 2019-2020. *JAMA Netw Open*. Published April 27, 2023.

doi:10.1001/jamanetworkopen.2023.11250

### Data

**Data available:** No

### Additional Information

**Explanation for why data not available:** Already publicly available
